# Supplementary material for: Distinct effects of several ice production processes on thunderstorm electrification and lightning activity
Source: Copernicus journal article supplement (doi:10.5194/egusphere-2025-214), 2025-03-11
Supplement: Supplementary file [file egusphere-2025-214-AC2-supplement.pdf]

## Reply on RC2

---

**RC2:** The manuscript “Distinct effects of several ice production processes on thunderstorm electrification and lightning activity” simulates three idealized storms, specified by the cloud base temperature and depth of the warm-phase layer, to assess the influence of aerosol concentration (CCN and INP) and three SIP processes (Hallett-Mossop rime splintering, raindrop shattering by freezing, and collision ice breakup) on cloud microphysics (ice crystal number concentration, cloud water content, graupel mass) and on electrification/lightning activity (charging rate on graupel, total number of flashes, and time of the first flash). The main results include an increase in lightning activity with the increase of CCN concentration up to a threshold as found in previous studies, but here it is shown that this threshold value varied depending on the INP concentration and type of storm. Each SIP process impacted the cloud electrification and lightning activity differently depending on the thickness of the cloud’s warm-phase. The results also highlight that activating SIP processes in the simulations impacted more dramatically the lightning activity than varying/adjusting aerosol concentrations (CCN or INP). In general, the study is well-structured and presents valuable and relevant contributions within the scope of ACP, but there are some inconsistencies mainly in sections 3 and 4. My comments are included below.

We thank the reviewers for their time and efforts in reviewing our manuscript. The responses to their comments are addressed below.

### General Comments:

- Aerosol concentration and SIP process for control run In line 176, it is mentioned that the aerosol concentrations were kept constant at  $N_{CCN} = 1000 \text{ cm}^{-3}$  and  $N_{INP} = 10 \text{ L}^{-1}$  when analyzing the impact of the SIP processes. Why were these values chosen? Was there an additional evaluation to arrive at these values? Was this choice made based on a paper? If so, I recommend including the citation. CCN concentration of  $1000 \text{ cm}^{-3}$  could be considered part of the high range of CCN concentration (Mansell and Ziegler, 2013). If not, I suggest including, mentioning or highlighting what would be realistic values or range of values for the three types of storms, since the chosen sensitivity range spans a more extensive range not explored by other studies as mentioned in lines 165-174. Additionally, in line 174, why only the HM process is activated in the first set of simulation varying aerosol concentrations? Could the reasoning for this decision also be included?

As pointed out by the reviewers, we have not explained the choice of CCN and INP concentrations for simulations studying sensitivity to SIPs. As stated in the manuscript “aerosol concentrations are kept constant with  $N_{CCN} = 1000 \text{ cm}^{-3}$  and  $N_{INP} = 10 \text{ L}^{-1}$ ”. These concentrations are supposed to be representative of average aerosol conditions. Rose et al. (2021) have surveyed aerosol concentrations using the network of Global Atmosphere Watch (GAW) near-surface observatories. Over the continents, total aerosol concentrations range between  $1000 \text{ cm}^{-3}$  in rural areas to  $10^4 \text{ cm}^{-3}$  in urban areas. Using particle number concentration in the range 100-500 nm as a proxy for potential CCN population (see their Figure 12), they showed that, from this dataset, the potential CCN concentration ranges between a few hundreds to a few thousands particles  $\text{cm}^{-3}$ . Moreover, in their modeling

study, Mansell and Ziegler (2013) used 13 base values of CCN concentration (50, 100, 200, 300, 500, 700, 1000, 1500, 2000, 3000, 4000, 5000, and 8000  $\text{cm}^{-3}$ ) for which 1000  $\text{cm}^{-3}$  is the median value. Sun et al. (2021) used an initial CCN concentration of 1200  $\text{cm}^{-3}$ , typical of continental values. Regarding INP concentrations, Figure 1-10 of Kanji et al. (2017) combines various measures of INP concentrations at different temperatures. At temperatures colder than  $-15^{\circ}\text{C}$ , most studies exhibit INP concentrations between 0.5 and 50  $\text{L}^{-1}$ . Phillips et al. (2007) performed sensitivity tests on  $N_{\text{INP}}$  in a convective case. Observations showed  $N_{\text{INP}}$  of around 3  $\text{L}^{-1}$ , and two tests representing high and extreme  $N_{\text{INP}}$  cases were simulated with  $N_{\text{INP}}$  of 30 and 3000  $\text{L}^{-1}$ , respectively. We are aware that the three storms might have different aerosol conditions. However we decided to set the same initial aerosol concentrations to make it easier to compare the activity of the SIP mechanisms in each storm.

In order to justify our choice of  $N_{\text{CCN}}$  and  $N_{\text{INP}}$  for the sensitivity tests dedicated to the SIP mechanisms, a paragraph has been added in Section 2.3:

*“In this series of simulations, aerosol concentrations representative of average aerosol conditions are used. Rose et al. (2021) have surveyed aerosol concentrations using the network of Global Atmosphere Watch (GAW) stations. Using particle number concentration in the range 100-500 nm as a proxy for potential CCN population, they showed that the potential CCN concentration ranges between a few hundreds to a few thousands particles  $\text{cm}^{-3}$  over the continents. Mansell and Ziegler (2013) and Sun et al. (2021) used values around 1000  $\text{cm}^{-3}$  in their modeling studies. Regarding INP concentrations, Kanji et al. (2017) showed that most studies exhibit INP concentrations between 0.5 and 50  $\text{L}^{-1}$  at temperatures colder than  $-15^{\circ}\text{C}$ . Therefore,  $N_{\text{CCN}} = 1000 \text{ cm}^{-3}$  and  $N_{\text{INP}} = 10 \text{ L}^{-1}$  are used in all these simulations.”*

For decades, 2-moment schemes include a parameterization of the Hallett-Mossop ice multiplication mechanism (e.g., Ferrier, 1994 ; Meyers et al., 1997 ; Seifert and Beheng, 2006 ; Vié et al., 2016). On the contrary, the collisional ice breakup (CIBU) and the raindrop shattering by freezing (RDSF) mechanisms have been only recently included in microphysics schemes (Phillips et al., 2017; Hoarau et al., 2018, Phillips et al., 2018; Sullivan et al, 2018). In particular, uncertainties remain regarding the number of fragments produced by these processes (Grzegorzczuk et al., 2025). Moreover, today, CIBU and RDSF can be activated or deactivated in LIMA at the user’s discretion while HM is systematically activated (Taufour et al., 2024). For these two reasons, it was decided to keep HM active in the first series of simulations. A short statement has been added in Section 2.3 to justify it:

*“In this first set of simulations, only the HM process as a SIP mechanism is activated. For decades, two-moment schemes include a parameterization of the HM process (e.g. Ferrier, 1994; Straka and Mansell, 2005; Seifert and Beheng, 2006; Vié et al., 2016), while the CIBU and RDSF mechanisms have been only recently included in microphysics schemes (Phillips et al., 2017a, 2018; Hoarau et al., 2018; Sullivan et al., 2018; Grzegorzczuk et al., 2025a) with uncertainties remaining regarding the number of fragments produced by these processes (Grzegorzczuk et al., 2025b). Moreover, CIBU and RDSF can be activated or deactivated in LIMA at the user’s discretion while HM is systematically activated. Therefore, it was decided to keep HM active in these first series of simulations.”*

- **Charge separation parameterization** In line 163, the authors state that “... the non-inductive charge separation is parameterized following Takahashi (1978)...” Although it is mentioned in line 528 “... there is still no consensus on the parameterization of the non-inductive process, and several existing parameterizations should be tested.” I expected the manuscript to provide more detail on the implementation of this parameterization and to discuss the potential implications its selection may have on the results. This is particularly important given that the Saunders and Peck (1998) scheme is widely used and has been shown to also successfully reproduce inverted-polarity charge structures, as demonstrated by for example by Kuhlman et al. (2006).

Several parameterizations of the non-inductive mechanism (e.g., Takahashi, 1978 ; Saunders et al., 1991 ; Saunders and Peck, 1998) are available in Meso-NH as described in Barthe and Pinty (2007) and Tsenova et al. (2013). We are aware that the Saunders and Peck's (1998) formulation has been frequently used in many numerical studies and was able to reproduce charge structures observed in storms (Kuhlman et al., 2006 ; Fierro et al., 2006, 2013 ; Mansell et al., 2010 ; Sun et al., 2021). However, we opted for the parameterization of Takahashi (1978) which was also used in various numerical studies (Barthe et al., 2007 ; Barth et al., 2007 ; Pinty et al., 2013 ; Bovalo et al., 2019 ; Popova et al., 2022 ; Phillips et al., 2022). This choice was motivated by recent laboratory studies that show strong similarities between the charge reversal line in Takahashi (1978) and the ones in Pereyra et al. (2000), Saunders et al. (2006) or Emersic and Saunders (2010). Some discrepancies appear when the temperature and the liquid water content decrease. The recent laboratory experiment by Luque et al. (2020) has found similar behavior as Pereyra et al. (2000), Saunders et al. (2006), and Emersic and Saunders (2010), meaning that the parameterization of Takahashi (1978) in Meso-NH should be modified in the future.

Numerous studies have shown that the choice of the non inductive process parameterization can strongly influence model results, both in terms of charge structure and number of flashes (Helsdon et al., 2001 ; Altaratz et al., 2005 ; Mansell et al., 2005 ; Barthe and Pinty, 2007 ; Fierro et al., 2006 ; Kuhlman et al., 2006 ; Tsenova et al., 2013). Therefore, the charge structures shown in this study would be different if the Saunders and Peck (1998) parameterization was used. However, the objective of this study is not to evaluate which parameterization of the non-inductive process is the best suited for storm modeling, but rather to isolate and explore the effect of ice production on cloud electrification. An evaluation of the non-inductive mechanism parameterization should be done in a real case simulation with microphysical, dynamical and electrical observations.

In the new version of the manuscript, we added a paragraph in Section 2.2 to justify the choice of the non-inductive process parameterization, and another one in Sections 3.3 to discuss the uncertainties about the parameterization of the non-inductive process.

*“The choice of the non inductive charging parameterization can impact model results, both in terms of charge structure and total number of flashes (Helsdon Jr. et al., 2001; Altaratz et al., 2005; Mansell et al., 2005; Barthe and Pinty, 2007a; Fierro et al., 2006; Kuhlman et al., 2006; Tsenova et al., 2013). Both the parameterizations of Saunders and Peck (1998) and Takahashi (1978) have been widely used to simulate the electrical activity of thunderstorms. However, recent laboratory studies have shown strong similarities between the charge reversal line in Takahashi (1978) and the ones in Pereyra et al. (2000), Saunders et al. (2006) or Emersic and Saunders (2010), leading us to choose the parameterization of Takahashi (1978) for the non-inductive charge separation in this study.”*

*“Variations in aerosol concentrations modify both the amplitude and the sign of the charge exchanged during the non-inductive process, and thus the polarity of the cloud’s charge structures. Numerous studies have shown that the choice of the non-inductive process parameterization can strongly influence model results, both in terms of charge structure and number of flashes (Helsdon Jr. et al., 2001; Altaratz et al., 2005; Mansell et al., 2005; Barthe and Pinty, 2007a; Fierro et al., 2006; Kuhlman et al., 2006; Tsenova et al., 2013). Therefore, the charge structures shown in this study would be different if the Saunders and Peck (1998) parameterization was used. However, the objective of this study is not to evaluate which parameterization of the non-inductive process is the best suited for storm modeling, but rather to isolate and explore the effect of ice production on cloud electrification.”*

- Charge density instead of just the charging rate on graupel Figures 3 and 9 only present the charging rate on graupel, but this information alone does not provide a clear indication of the storm’s overall charge structure. I would strongly suggest providing cross-sectional plots of the charge density to reduce ambiguity in the interpretation and validation of the results. Additionally, Figure 1 presents only the thickness of the warm, mixed and cold-phase regions of the three idealized storms. It would be beneficial to include additional context of the simulation results such as plots of the simulated radar reflectivity to illustrate how these storms evolve and to better connect to the idealized setups.

A general problem when carrying out a large series of numerical simulations is to illustrate the results in a synthetic way. Clearly, it is not possible to produce vertical cross-sections for all storms. Changes in aerosol concentrations, and the activation or non-activation of SIPs modify the cloud structure, especially at the end of the simulation.

However, we understand the need to have more information about the context of each idealized storm. So as not to make the already relatively long article too long, we have decided to include both the soundings used to initialize the idealized storms (Figure S1), and representative vertical cross-sections of the three simulated storms (Figure S2) as Supplementary Material. The vertical cross-sections have been plotted for the 3 storms, but for only one simulation each. We have selected to show cross-sections for the following set up:  $N_{CCN} = 1000 \text{ cm}^{-3}$ ,  $N_{INP} = 10 \text{ L}^{-1}$ , HM activated, CIBU and RDSF deactivated. This setup corresponds to the common simulation between the two series of sensitivity tests.

In the same way, it is not an easy task to produce synthetic and representative plots of the charge structure for the 87 simulations. The large number of simulations is compounded by the complexity of the electric charge structure. As shown in Figure 1 below, and as stated in Stolzenburg et al. (1998), the charge structure may differ depending on the region of the convective system. But, as mentioned by the reviewers, knowledge of the electrical charge structure is an important piece of information. We have therefore decided to include a new figure showing charge density. As it is impossible to show 87 vertical cross-sections of the charge structure, we decided to plot the average of the positive and negative charge density for each simulation. Since the electric charge layers are not horizontally aligned, the resulting profiles are quite noisy, but general trends are visible. Due to the difficulty of assigning a distinct charge structure from the average of positive and negative charges, it was decided to include this figure as Supplementary Material (Figures S3 and S4).

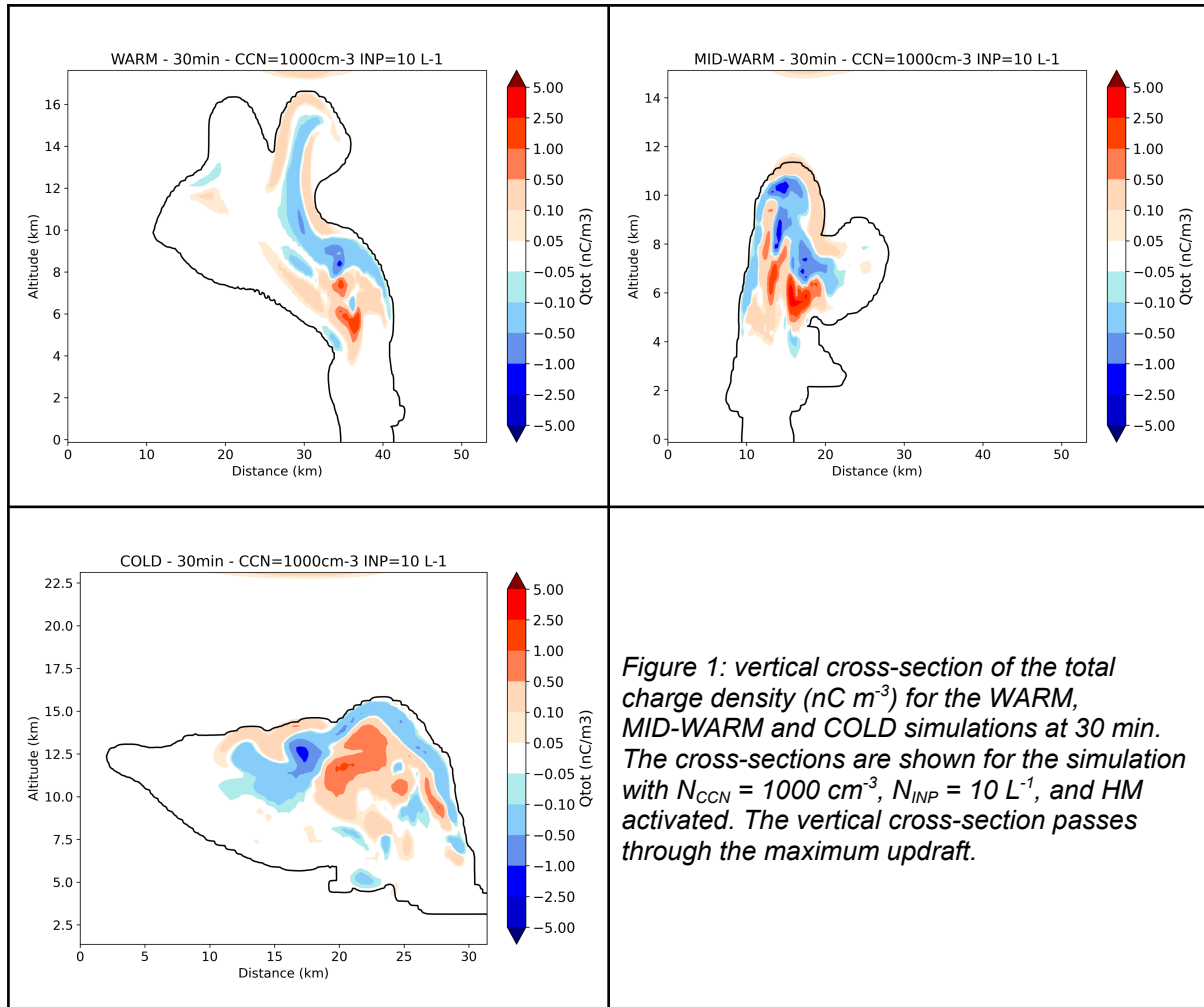

- Comparison with Phillips and Patade (2022) The results for the cold case are compared with those of Phillips and Patade (2022), showing consistency on the importance of the CIBU process, as noted in line 516: “This is consistent with Phillips and Patade (2022) results for a cold-base thunderstorm in which HM and RDSF are almost inactive.” There are more details in the introduction from Phillips and Patade (2022) and the effect of CIBU on CWC in line 66 “Phillips and Patade (2022) found that the most active SIP process was breakup during ice-ice collisions. This process, acting as a sink of liquid water content, has the ability to alter the polarity of the charge Graupel acquires and, consequently, the electric charge structure.” However, in line 437 and referring to figure 12 the manuscript states that: “The COLD case does not show any impact of the SIP processes on the average CWC profile in the early cloud electrification stage... As cloud electrification starts during the development stage of the cloud, SIP processes have not yet consumed CWC.” The comparison as currently presented appears to lack consistency. I recommend revising the text and revisiting the simulation/analysis to address potential contradictions of the results also within the manuscript and ensure a clearer discussion.

We agree that the comparison with Phillips and Patade (2022) lacks consistency. The insensitivity of CWC to SIP processes in our study was also pointed out by the RC1. Several factors mostly in LIMA could explain why in our simulations CWC shows little changes despite the production of a high number of ice crystals by SIP processes.



Firstly, it partly results from the data being sampled during the electrification period defined in this study. At the mature stage, the simulations start to diverge; the ALLSIP simulation having the least CWC. However the differences remain small compared to the stronger sensitivity of CWC to aerosol concentrations.

A possible explanation for this weak response is the use of a saturation adjustment scheme in LIMA. This adjustment, applied after all other microphysical processes, forces the environment to reach a strict equilibrium at water saturation at the end of each time step, by condensing water vapor or evaporating cloud droplets depending on whether the air is supersaturated or sub-saturated. In a general way, Khain et al. (2015) examined the bin and bulk parameterizations of microphysics and stated that “the utilization of saturation adjustment during diffusional growth introduces errors in CWC”. Previous studies have identified limitations of using saturation adjustment, including overestimation of the condensate mass (Khain et al., 2015), and enhanced rain formation that reduces supercooled water in the mixed-phase region (Zhang et al., 2021). Previous studies that reported a decrease in liquid water content with the introduction of SIP processes (Phillips et al., 2022; Huang et al., 2024; Grzegorzczuk et al., 2025) explicitly computed condensation and vapor deposition, unlike the LIMA scheme.

Another possible reason is that in the version of LIMA used in this study (v1.0; Vié et al., 2016), snow and graupel number concentrations are not prognostic. In contrast, the extended version of LIMA (v2.0; Taufour et al., 2024), includes prognostic number concentrations for all hydrometeor categories. Taufour et al. (2024) showed that in LIMA v1.0, snow and graupel form rapidly, consuming cloud droplets, raindrops, and ice crystals. In LIMA v2.0 their formation is more gradual.

A discussion was added about the insensitivity of CWC to SIP processes and contradiction with Phillips and Patade (2022) results in section 4.2.2.:

*“The weak sensitivity of CWC to SIP processes may result from several factors. Data sampling during the electrification period limits the detection of differences, which occur more significantly during the storm's mature stage. The use of saturation adjustment in LIMA, which enforces 100% RH could be a constraint, as it can overestimate condensate mass and enhance rain formation, reducing supercooled water (Khain et al., 2015; Zhang, 2021). In contrast, studies showing stronger CWC responses to SIP explicitly compute condensation and vapor deposition (Phillips et al., 2022; Grzegorzczuk et al., 2022; Huang et al., 2025). Additionally, in the version of LIMA used here (v1.0) snow and graupel number concentrations are not prognostic, potentially accelerating their formation and depleting liquid and small ice species as shown by Taufour et al. (2024) in comparisons with LIMA v2.0.”*

## **Specific Comments:**

### **Abstract**

Line 13: What impact on electrification is this referring to? Is it regarding the polarity, the charge magnitude, number of flashes, ...?

This part of the sentence was not clear and has been modified.

### **Introduction**

Suggest include citations for the sentences starting in lines 20 and 21.

We added citations as recommended:

- Line 20: Reynolds et al. (1957) and Takahashi (1978)
- Lines 21-22: Norville et al. (1991) and Heldson et al. (2001)

### 2.1.1 Microphysical scheme

In lines 101 and 105, the authors introduce abbreviations for the SIP processes: collisional ice break-up as CIBU and raindrop shattering freezing as RDSF. But in line 99, there is no mention of the abbreviation of the Hallett-Mossop process as HM. Additionally to maintain consistency, in line 315 and 505, this process is referred to as rime splintering, when throughout the manuscript HM process has been used. This term could be introduced in line 99 as well.

We added the mention of the abbreviation HM and introduced the term “rime splintering”.

In lines 108-118, the manuscript provides implemented equations, expressions and values for the RDSF process. But the same treatment is not given to the other SIP processes HM and CIBU. Is there a reason for expanding the explanation just for RDSF and not the other processes? Was the RDSF implementation different from the cited studies?

We provided a more detailed description of the RDSF process as it is the first time this process is activated in a study with the atmospheric model Meso-NH and its microphysics scheme LIMA. We modified the text in Section 2.1.1 to make clearer that the HM and CIBU parameterizations in LIMA were already presented in Vié et al. (2016) and Hoarau et al. (2018), respectively.

The units for INP concentrations are given in  $L^{-1}$ , but in line 172, a reference from concentrations used in another study are given in  $cm^{-3}$ . Writing the concentrations in the same units would help the reader to compare the range and values considered.

The INP concentrations used in Yang et al. (2000) have been converted in  $L^{-1}$ .

### Results: Sections 3 and 4

Recommend maintaining a structure in the results sections 3 and 4. In section 3, it is presented the following subsections:

- 3 Aerosol impact on cloud electrification and lightning activity
  - 3.1 Electrical activity
  - 3.2 Microphysical structure of the storms
    - 3.2.1 Cloud water content
    - 3.2.2 Ice crystal concentration
    - 3.2.3 Graupel mass
  - 3.3 The relationship between aerosols, microphysics and electrification

In section 4, they are:

- 4 Effect of secondary ice production on cloud electrification and lightning activity
  - 4.1 Electrical activity
  - 4.2 Microphysics
    - 4.2.1 Ice crystal number concentration
    - 4.2.2 Cloud water content

#### 4.2.3 Graupel mass

#### 4.2.4 The relationship between SIP processes, microphysics and electrification

So, the subsection titles and the order they appeared are modified from what was in section 3. Recommend keeping this consistent.

We modified the subsections in the new version of the manuscript. However, we decided to keep the structure of Section 4, and to implement it in Section 3. Since this paper deals with ice production processes, it seems logical to first look at ice crystal number concentration.

In line 190: "... we will focus on the modification of the electrical activity and of the microphysics of each idealized case due to the sensitivity tests rather than on the differences between the three cases with the same aerosol concentration and SIP process conditions." But, in line 373 the results are compared across storms under the same set of conditions: "This enhancement is 7 times higher in the WARM case than in the MID-WARM case." How much are their respective increases compared to just HM or HM+CIBU?

You are right. This sentence has been removed in the new version of the manuscript, and the previous one has been modified to give more information on the enhancement factor for each simulation.

In line 268, when referring to the Takahashi diagram, I would suggest citing the paper, since there are a couple of Takahashi's papers in the References section.

The citation to Takahashi (1978) has been added.

There are several mentions of high and low values for  $N_{CCN}$  and  $N_{INP}$  but the range is only specified later in the section. I would suggest making it more clear at the beginning of the section or on the sensitivity test section the ranges for low, medium and high  $N_{CCN}$  and  $N_{INP}$ .

The ranges for low, medium and high  $N_{CCN}$  and  $N_{INP}$  are now specified in Section 2.3:

*"In the remainder of the paper, low  $N_{CCN}$  refers to  $500 \text{ cm}^{-3}$ , medium to  $1000$  and  $5000 \text{ cm}^{-3}$  and high to  $8000$  and  $10,000 \text{ cm}^{-3}$ . Low  $N_{INP}$  corresponds to  $0.1$ ,  $1$  and  $10 \text{ L}^{-1}$ , medium to  $100 \text{ L}^{-1}$  and high to  $1000 \text{ L}^{-1}$ ."*

For the warm case, what is the range that the HM process is maximum/most intense, since the following sentences seem to disagree? In line 315: "That is why the HM process is the most intense for intermediate values of  $N_{CCN}$  in the WARM and MID-WARM cases." But in line 309: "For the WARM and COLD cases, the HM process rate is maximum for high  $N_{INP}$  ( $\geq 100 \text{ L}^{-1}$ ) and high  $N_{CCN}$  ( $\geq 5000 \text{ cm}^{-3}$ )."

At line 315, we wanted to underline the threshold effect by using the expression "intermediate values of  $N_{CCN}$ ". To remain consistent with the definition of low, medium and high  $N_{CCN}$  in Section 2.3, we change it to : *"not for the highest  $N_{CCN}$  but at  $8000 \text{ cm}^{-3}$  and  $1000 \text{ cm}^{-3}$  in the WARM and MID-WARM cases, respectively"*.

At line 309, the text was also changed to: *"...is maximum for  $N_{INP} \geq 100 \text{ L}^{-1}$  and  $N_{CCN} \geq 5000 \text{ cm}^{-3}$ ."*



Line 325: “It suggests graupel mass is not a limiting ingredient for cloud electrification, but it can modulate the amplitude of the charge exchanged during the non-inductive process.” I would recommend explaining this better as it is not clear to me the results are suggesting this.

We removed this sentence as it does not apply for all cases. High graupel mass is correlated with high non inductive charging rate and total flash number especially in the MID-WARM case, but in the two other cases the relationship between graupel mass and electric activity is not clear.

There are numerous instances where the word “whatever” is used. I would recommend replacing it with “regardless of” or “independent of”.

All whatever occurrences were replaced with “regardless of”, “independent of”, “for any values of” and “across all ...”.

Line 338: “The formation is accelerated but the intensity is weaker leading to a lower graupel mass at high N\_INP.” The intensity of what is being referenced here?

We talk about the intensity of graupel mass growth. This is specified in the new version of the manuscript.

Lines 378-380. These sentences could be combined to avoid repetition.

The two sentences have been combined: “*In the WARM and MID-WARM cases, the dramatic increase in total flashes is largely due to the combined and significant impact of the RDSF and CIBU processes.*”

Line 395: “In the WARM case, the HM process tendency is identical for the two pairs of simulations HM and HM+CIBU ( $6.5 \times 10^9 \text{ kg}^{-1} \text{ s}^{-1}$ ), and HM+RDSF and ALLSIP ( $7.1$  and  $7.2 \times 10^9 \text{ kg}^{-1} \text{ s}^{-1}$ )...”  $7.1$  and  $7.2$  are not identical values.

We changed the word “identical” with “similar”.

Is the result in line 397: “The CIBU process is very efficient in producing ice crystals over the whole mixed and cold cloud depth, leading to an increase of ice crystal number concentration by around two orders of magnitude (green and blue lines in Fig. 11a).” in comparison to NOSIP or HM simulation?

It is in comparison to the NOSIP simulation (blue line). It is clarified in the new version of the manuscript.

Line 399: “RDSF is the most efficient SIP in this storm; it induces a maximum of  $1000 \text{ L}^{-1}$  (orange line in Fig. 11a).” What altitude and/or temperature does this correspond to?

We added “at 15 km altitude”.

Line 400: “Despite being the most active at  $-15^\circ\text{C}$ , the RDSF process results in high  $N_i$  throughout the whole mixed and cold cloud depth...” There is not an isotherm line for  $-15^\circ\text{C}$ , so what altitude does it correspond to?

It corresponds to 7.5 km altitude ; it was added in the manuscript.

Line 402: “When the three SIP processes are active (ALLSIP), they add up to produce mean ice crystal number concentration that reaches a maximum of  $1500 \text{ L}^{-1}$ .” Is this maximum ice crystal concentration at the same altitude of the  $1000 \text{ L}^{-1}$  peak for process RDSF (line 399)?

The peak in ALLSIP is at the same altitude as in the RDSF simulation.

Is “the HM+RDSF simulation presents lower values of ice crystal concentration along the vertical profile” in line 410 a comparison to the lower values in the HM+CIBU simulations?

It is in comparison to the overall vertical profile of HM+CIBU simulation. Although a similar peak at an altitude of 8 km, the HM+CIBU simulation presents a higher ice crystal concentration at other altitudes.

Line 413: “Actually, RDSF needs a deep warm-phase cloud depth and a moderate updraft which will help raindrops to grow and to be lifted up to the right temperature region (Sullivan et al., 2018)” what is the right temperature region?

The right temperature region is around  $-15^\circ\text{C}$  where the maximum probability of shattering is reached in the RDSF parameterization. This is now specified in the text.

Line 414: “Interestingly, in the ALLSIP simulation, the RDSF process 415 tendency is tripled compared to the HM+RDSF simulation.” This refers to figure 10b, right? Add it here.

You are right. The reference to this figure has been added.

Line 421: They increase the mean ice crystal number concentration by up to a factor of 1000 in the temperature range in which they are active.” What is this temperature range?

HM process is active between  $-8$  and  $-3^\circ\text{C}$ , and CIBU is active in the mixed and cold phase region. It has been specified in the text.

Line 428: “In the MID-WARM case, CWC is higher in the NOSIP simulation than in all simulations where SIP processes are activated near the  $0^\circ\text{C}$  isotherm.” It looks like it is activated until close to  $-10^\circ\text{C}$  isotherm.

You are right, this sentence is not clear. It has been modified in the revised manuscript: “*In the MID-WARM case, in the altitude range between the  $10^\circ\text{C}$  and  $-10^\circ\text{C}$  isotherms, CWC is higher in the NOSIP simulation than in all simulations where SIP processes are activated.*”

Line 439: “... the non-inductive charging process only occurs at high altitude (between 7.5 and 11 km), where ice crystals are available...” Figure 9 shows charge separation occurring for ALLSIP simulation from 5 km altitude.

We forgot to specify that this comment was only for the NOSIP simulation; it is now specified.

In line 473, what does “different cloud electrification onsets” mean? Do the plots in Figure 4 for  $N_{\text{CCN}} = 1000 \text{ cm}^{-3}$  (black line),  $N_{\text{INP}} = 10 \text{ L}^{-1}$  (third row) match the ones for Figure 12 with HM process (black line)? Could this correspondence of control cases be included in the manuscript?

Cloud electrification onsets refer to the beginning of cloud electrification defined at the beginning of section 3.2.

The black lines in Figures 9 and 12 are from the same simulation. We added a sentence about this correspondence in Section 2.3.

## Conclusions

Line 491: “As for the HM process, it is maximum at intermediate or high  $N_{CCN}$  levels ( $1000 - 10,000 \text{ cm}^{-3}$ )” Is maximum at producing ice crystals? Also, inconsistent definition for the high range of  $N_{CCN}$  in line 308. Lines 497-500. Combine sentences to avoid repetition.

In the revised version of the article, we only kept the range of values for  $N_{CCN}$  without specifying the intensity of  $N_{CCN}$  levels.

The two sentences at lines 497-500 have been combined.

Line 500: “Mansell and Ziegler (2013) attributed the decrease of lightning activity with NCCN to the HM process...” A decrease is observed once the threshold value is exceeded?

Yes, the total number of flashes reaches its maximum at the  $N_{CCN}$  threshold value and then decreases at higher  $N_{CCN}$  (see their figure 9 for the HM1 simulation).

Line 503: “Thus, both particles has to be taken into account to ...” Adjust to: Both aerosol particles have to be ...

Done.

## References

Altartatz, O., Reisin, T., and Levin, Z.: Simulation of the electrification of winter thunderclouds using the three-dimensional Regional Atmospheric Modeling System (RAMS) model: Single cloud simulations, *J. Geophys. Res.: Atmos.*, 110, 2004JD005 616, <https://doi.org/10.1029/2004JD005616>, 2005.

Barth, M. C., Kim, S.-W., Wang, C., Pickering, K. E., Ott, L. E., Stenchikov, G., Leriche, M., Cautenet, S., Pinty, J.-P., Barthe, C., Mari, C., Helsdon, J. H., Farley, R. D., Fridlind, A. M., Ackerman, A. S., Spiridonov, V., and Telenta, B.: Cloud-scale model intercomparison of chemical constituent transport in deep convection, *Atmos. Chem. Phys.*, 7, 4709–4731, <https://doi.org/10.5194/acp-7-4709-2007>, 2007.

Barthe, C. and Pinty, J.: Simulation of electrified storms with comparison of the charge structure and lightning efficiency, *J. Geophys. Res. Atmos.*, 112, 2006JD008 241, <https://doi.org/10.1029/2006JD008241>, 2007.

Bovalo, C., Barthe, C., and Pinty, J.: Examining relationships between cloud-resolving model parameters and total flash rates to generate lightning density maps, *Q. J. Roy. Meteor. Soc.*, 145, 1250–1266, <https://doi.org/10.1002/qj.3494>, 2019.

Emersic, C. and Saunders, C.: Further laboratory investigations into the Relative Diffusional Growth Rate theory of thunderstorm electrification, *Atmos. Res.*, 98, 327–340, <https://doi.org/10.1016/j.atmosres.2010.07.011>, 2010.

- Ferrier, B. S.: A Double-Moment Multiple-Phase Four-Class Bulk Ice Scheme. Part I: Description, *J. Atmos. Sci.*, 51, 249 – 280, [https://doi.org/10.1175/1520-0469\(1994\)051<0249:ADMMPF>2.0.CO;2](https://doi.org/10.1175/1520-0469(1994)051<0249:ADMMPF>2.0.CO;2), 1994.
- Fierro, A. O., M. S. Gilmore, E. R. Mansell, L. J. Wicker, and J. M. Straka: Electrification and Lightning in an Idealized Boundary-Crossing Supercell Simulation of 2 June 1995. *Mon. Wea. Rev.*, 134, 3149–3172, <https://doi.org/10.1175/MWR3231.1>, 2006.
- Fierro, A. O., E. R. Mansell, D. R. MacGorman, and C. L. Ziegler: The Implementation of an Explicit Charging and Discharge Lightning Scheme within the WRF-ARW Model: Benchmark Simulations of a Continental Squall Line, a Tropical Cyclone, and a Winter Storm. *Mon. Wea. Rev.*, 141, 2390–2415, <https://doi.org/10.1175/MWR-D-12-00278.1>, 2013.
- Grzegorzczak, P., Wobrock, W., Canzi, A., Niquet, L., Tridon, F., and Planche, C.: Investigating secondary ice production in a deep convective cloud with a 3D bin microphysics model: Part II - Effects on the cloud formation and development, *Atmos. Res.*, 314, 107–179, <https://doi.org/10.1016/j.atmosres.2024.107797>, 2025.
- Grzegorzczak, P., Wobrock, W., Canzi, A., Niquet, L., Tridon, F., and Planche, C.: Investigating secondary ice production in a deep convective cloud with a 3D bin microphysics model: Part I - Sensitivity study of microphysical processes representations, *Atmos. Res.*, 313, 107–174, <https://doi.org/10.1016/j.atmosres.2024.107774>, 2025.
- Helsdon Jr., J. H., Wojcik, W. A., and Farley, R. D.: An examination of thunderstorm-charging mechanisms using a two-dimensional storm electrification model, *J. Geophys. Res.: Atmos.*, 106, 1165–1192, <https://doi.org/10.1029/2000JD900532>, 2001.
- Hoarau, T., Pinty, J.-P., and Barthe, C.: A representation of the collisional ice break-up process in the two-moment microphysics LIMA v1.0 scheme of Meso-NH, *Geosci. Model Dev.*, 11, 4269–4289, <https://doi.org/10.5194/gmd-11-4269-2018>, 2018.
- Kanji, Z. A., L. A. Ladino, H. Wex, Y. Boose, M. Burkert-Kohn, D. J. Cziczo, and M. Krämer: Overview of Ice Nucleating Particles. *Meteor. Monogr.*, 58, 1.1–1.33, <https://doi.org/10.1175/AMSMONOGRAPHS-D-16-0006.1>, 2017.
- Kuhlman, K. M., C. L. Ziegler, E. R. Mansell, D. R. MacGorman, and J. M. Straka: Numerically Simulated Electrification and Lightning of the 29 June 2000 STEPS Supercell Storm. *Mon. Wea. Rev.*, 134, 2734–2757, <https://doi.org/10.1175/MWR3217.1>, 2006.
- Luque, M. Y., Nollas, F., Pereyra, R. G., Bürgesser, R. E., & Ávila, E. E.: Charge separation in collisions between ice crystals and a spherical simulated graupel of centimeter size. *J. Geophys. Res. Atmos.*, 125, e2019JD030941. <https://doi.org/10.1029/2019JD030941>, 2020.
- Mansell, E. R., MacGorman, D. R., Ziegler, C. L., and Straka, J. M.: Charge structure and lightning sensitivity in a simulated multicell thunderstorm, *J. Geophys. Res.: Atmos.*, 110, 2004JD005 287, <https://doi.org/10.1029/2004JD005287>, 2005.
- Mansell, E. R., C. L. Ziegler, and E. C. Bruning: Simulated Electrification of a Small Thunderstorm with Two-Moment Bulk Microphysics. *J. Atmos. Sci.*, 67, 171–194, <https://doi.org/10.1175/2009JAS2965.1>, 2010.
- Mansell, E. R. and Ziegler, C. L.: Aerosol Effects on Simulated Storm Electrification and Precipitation in a Two-Moment Bulk Microphysics Model, *J. Atmos. Sci.*, 70, 2032–2050, <https://doi.org/10.1175/JAS-D-12-0264.1>, 2013.
- Meyers, M. P., Walko, R. L., Harrington, J. Y., and Cotton, W. R.: New RAMS cloud microphysics parameterization. Part II: The two-moment scheme, *Atmos. Res.*, 45, 3–39, [https://doi.org/10.1016/S0169-8095\(97\)00018-5](https://doi.org/10.1016/S0169-8095(97)00018-5), 1997.

- Norville, K., Baker, M., and Latham, J.: A numerical study of thunderstorm electrification: Model development and case study, *J. Geophys. Res. Atmos.*, 96, 7463–7481, <https://doi.org/https://doi.org/10.1029/90JD02577>, 1991.
- Pereyra, R. G., Avila, E. E., Castellano, N. E., and Saunders, C. P. R.: A laboratory study of graupel charging, *J. Geophys. Res. Atmos.*, 105, 20 803–20 812, <https://doi.org/10.1029/2000JD900244>, 2000.
- Phillips, V. T. J., L. J. Donner, and S. T. Garner: Nucleation Processes in Deep Convection Simulated by a Cloud-System-Resolving Model with Double-Moment Bulk Microphysics. *J. Atmos. Sci.*, 64, 738–761, <https://doi.org/10.1175/JAS3869.1>, 2007.
- Phillips, V. T. J., Yano, J.-I., Formenton, M., Ilotoviz, E., Kanawade, V., Kudzotsa, I., Sun, J., Bansemer, A., Detwiler, A. G., Khain, A., and Tessendorf, S. A.: Ice Multiplication by Breakup in Ice–Ice Collisions. Part II: Numerical Simulations, *J. Atmos. Sci.*, 74, 2789–2811, <https://doi.org/10.1175/JAS-D-16-0223.1>, 2017.
- Phillips, V. T. J., S. Patade, J. Gutierrez, and A. Bansemer: Secondary Ice Production by Fragmentation of Freezing Drops: Formulation and Theory. *J. Atmos. Sci.*, 75, 3031–3070, <https://doi.org/10.1175/JAS-D-17-0190.1>, 2018.
- Phillips, V. T. J. and Patade, S.: Multiple Environmental Influences on the Lightning of Cold-Based Continental Convection. Part II: Sensitivity Tests for Its Charge Structure and Land–Ocean Contrast, *J. Atmos. Sci.*, 79, 263–300, <https://doi.org/10.1175/JAS-D-20-0234.1>, 2022.
- Pinty, J.-P., Barthe, C., Defer, E., Richard, E., and Chong, M.: Explicit simulation of electrified clouds: From idealized to real case studies, *Atmos. Res.*, 123, 82–92, <https://doi.org/10.1016/j.atmosres.2012.04.008>, 2013.
- Popová, J., Sokol, Z., Šlegl, J., Wang, P., and Chou, Y.-L.: Research cloud electrification model in the Wisconsin dynamic/microphysical model 2: Charge structure in an idealized thunderstorm and its dependence on ion generation rate, *Atmos. Res.*, 270, 106 090, <https://doi.org/10.1016/j.atmosres.2022.106090>, 2022.
- Reynolds, S. E., Brook, M., and Gourley, M. F.: Thunderstorm charge separation, *J. Atmos. Sci.*, 14, 426–436, [https://doi.org/10.1175/1520-0469\(1957\)014<0426:TCS>2.0.CO;2](https://doi.org/10.1175/1520-0469(1957)014<0426:TCS>2.0.CO;2), 1957.
- Rose, C., Collaud Coen, M., Andrews, E., Lin, Y., Bossert, I., Lund Myhre, C., Tuch, T., Wiedensohler, A., Fiebig, M., Aalto, P., Alastuey, A., Alonso-Blanco, E., Andrade, M., Artíñano, B., Arsov, T., Baltensperger, U., Bastian, S., Bath, O., Beukes, J. P., Brem, B. T., Bukowiecki, N., Casquero-Vera, J. A., Conil, S., Eleftheriadis, K., Favez, O., Flentje, H., Gini, M. I., Gómez-Moreno, F. J., Gysel-Beer, M., Hallar, A. G., Kalapov, I., Kalivitis, N., Kasper-Giebl, A., Keywood, M., Kim, J. E., Kim, S.-W., Kristensson, A., Kulmala, M., Lihavainen, H., Lin, N.-H., Lyamani, H., Marinoni, A., Martins Dos Santos, S., Mayol-Bracero, O. L., Meinhardt, F., Merkel, M., Metzger, J.-M., Mihalopoulos, N., Ondracek, J., Pandolfi, M., Pérez, N., Petäjä, T., Petit, J.-E., Picard, D., Pichon, J.-M., Pont, V., Putaud, J.-P., Reisen, F., Sellegri, K., Sharma, S., Schauer, G., Sheridan, P., Sherman, J. P., Schwerin, A., Sohmer, R., Sorribas, M., Sun, J., Tulet, P., Vakkari, V., Van Zyl, P. G., Velarde, F., Villani, P., Vratolis, S., Wagner, Z., Wang, S.-H., Weinhold, K., Weller, R., Yela, M., Zdimal, V., and Laj, P.: Seasonality of the particle number concentration and size distribution: a global analysis retrieved from the network of Global AtmosphereWatch (GAW) near-surface observatories, *Atmos. Chem. Phys.*, 21, 17 185–17 223, <https://doi.org/10.5194/acp-21-17185-2021>, 2021.
- Saunders, C. P. R. and Brooks, I. M.: The effects of high liquid water content on thunderstorm charging, *J. Geophys. Res.-Atmos.*, 97, 14 671–14 676, <https://doi.org/10.1029/92JD01186>, 1991.
- Saunders, C. P. R. and Peck, S. L.: Laboratory studies of the influence of the rime accretion rate on charge transfer during crystal/graupel collisions, *J. Geophys. Res. Atmos.*, 103, 13 949–13 956, <https://doi.org/10.1029/97JD02644>, 1998.
- Saunders, C. P. R., Bax-Norman, H., Emersic, C., Avila, E. E., and Castellano, N. E.: Laboratory studies of the effect of cloud conditions on graupel/crystal charge transfer in thunderstorm electrification, *Q. J. R. Meteorol. Soc.*, 132, 2653–2673, <https://doi.org/10.1256/qj.05.218>, 2006.

- Seifert, A., Beheng, K.: A two-moment cloud microphysics parameterization for mixed-phase clouds. Part 1: Model description. *Meteorol. Atmos. Phys.*, 92, 45–66. <https://doi.org/10.1007/s00703-005-0112-4>, 2006
- Stolzenburg, M., W. D. Rust, and T. C. Marshall: Electrical structure in thunderstorm convective regions: 3. Synthesis, *J. Geophys. Res.*, 103(D12), 14097–14108, <https://doi.org/10.1029/97JD03545>, 1988.
- Straka, J. M. and Mansell, E. R.: A Bulk Microphysics Parameterization with Multiple Ice Precipitation Categories, *J. Appl. Meteor.*, 44, 445–466, <https://doi.org/10.1175/JAM2211.1>, 2005.
- Sullivan, S. C., Hoose, C., Kiselev, A., Leisner, T., and Nenes, A.: Initiation of secondary ice production in clouds, *Atmos. Chem. Phys.*, 18, 1593–1610, <https://doi.org/10.5194/acp-18-1593-2018>, 2018.
- Sun, M., Liu, D., Qie, X., Mansell, E. R., Yair, Y., Fierro, A. O., Yuan, S., Chen, Z., and Wang, D.: Aerosol effects on electrification and lightning discharges in a multicell thunderstorm simulated by the WRF-ELEC model, *Atmos. Chem. Phys.*, 21, 14 141–14 158, <https://doi.org/10.5194/acp-21-14141-2021>, 2021.
- Takahashi, T.: Riming Electrification as a Charge Generation Mechanism in Thunderstorms, *J. Atmos. Sci.*, 35, 1536–1548, [https://doi.org/10.1175/1520-0469\(1978\)035<1536:REAACG>2.0.CO;2](https://doi.org/10.1175/1520-0469(1978)035<1536:REAACG>2.0.CO;2), 1978.
- Taufour, M., Pinty, J.-P., Barthe, C., Vié, B., and Wang, C.: LIMA (v2.0): A full two-moment cloud microphysical scheme for the mesoscale non-hydrostatic model Meso-NH v5-6, *Geosci. Model Dev.*, 17, 8773–8798, <https://doi.org/10.5194/gmd-17-8773-2024>, 2024.
- Tsenova, B., Barthe, C., Mitzeva, R., and Pinty, J.-P.: Impact of parameterizations of ice particle charging based on rime accretion rate and effective water content on simulated with MésoNH thunderstorm charge distributions, *Atmos. Res.*, 128, 85–97, <https://doi.org/10.1016/j.atmosres.2013.03.011>, 2013.
- Vié, B., Pinty, J.-P., Berthet, S., and Leriche, M.: LIMA (v1.0): A quasi two-moment microphysical scheme driven by a multimodal population of cloud condensation and ice freezing nuclei, *Geosci. Model Dev.*, 9, 567–586, <https://doi.org/10.5194/gmd-9-567-2016>, 2016.
